1 **Genome-wide association study identifies genetic factors that modify age at onset in**  
2 **Machado-Joseph disease**

3 Fulya Akçimen<sup>1,2</sup>, Sandra Martins<sup>3,4</sup>, Calwing Liao<sup>1,2</sup>, Cynthia V. Bourassa<sup>2,5</sup>, H el ene Catoire<sup>2,5</sup>,  
4 Garth A. Nicholson<sup>6</sup>, Olaf Riess<sup>7</sup>, Mafalda Raposo<sup>8</sup>, Marcondes C. Fran ca Jr.<sup>9</sup>, Jo o  
5 Vasconcelos<sup>10</sup>, Manuela Lima<sup>8</sup>, Iscia Lopes-Cendes<sup>11,12</sup>, Maria Luiza Saraiva-Pereira<sup>13,14</sup>, Laura  
6 B. Jardim<sup>13,15</sup>, Jorge Sequeiros<sup>4,16,17</sup>, Patrick A. Dion<sup>2,5</sup>, Guy A. Rouleau<sup>1,2,5\*</sup>

7 <sup>1</sup>Department of Human Genetics, McGill University, Montr al, QC, Canada;

8 <sup>2</sup>Montreal Neurological Institute and Hospital, McGill University, Montr al, QC, Canada;

9 <sup>3</sup>i3S – Instituto de Investiga o e Inova o em Sa de, Universidade do Porto, Portugal;

10 <sup>4</sup>IPATIMUP – Institute of Molecular Pathology and Immunology of the University of Porto, Portugal;

11 <sup>5</sup>Department of Neurology and Neurosurgery, McGill University, Montr al, QC, Canada;

12 <sup>6</sup>University of Sydney, Department of Medicine, Concord Hospital, Australia;

13 <sup>7</sup>Institute of Medical Genetics and Applied Genomics, University of Tuebingen, Tuebingen, Germany;

14 <sup>8</sup>Faculdade de Ci ncias e Tecnologia, Universidade dos A ores e Instituto de Biologia Molecular e Celular  
15 (IBMC), Instituto de Investiga o e Inova o em Sa de (i3S), Universidade do Porto, Portugal;

16 <sup>9</sup>Department of Neurology, Faculty of Medical Sciences, UNICAMP, Campinas, SP, Brazil;

17 <sup>10</sup>School of Medical Sciences, Department of Medical Genetics and Genomic Medicine, University of  
18 Campinas (UNICAMP), Campinas, SP, Brazil;

19 <sup>11</sup>The Brazilian Institute of Neuroscience and Neurotechnology (BRAINN), Campinas, SP, Brazil;

20 <sup>12</sup>Departamento de Neurologia, Hospital do Divino Esp rito Santo, Ponta Delgada, Portugal;

21 <sup>13</sup>Medical Genetics Service, Hospital de Cl nicas de Porto Alegre (HCPA), Porto Alegre, Brazil;

22 <sup>14</sup>Depto. de Bioqu mica – ICBS, Universidade Federal do Rio Grande do Sul (UFRGS);

23 <sup>15</sup>Depto de Medicina Interna, Universidade Federal do Rio Grande do Sul (UFRGS), Porto Alegre, Brazil;

24 <sup>16</sup>Institute for Molecular and Cell Biology (IBMC), Universidade do Porto, Porto, Portugal;

25 <sup>17</sup>Instituto de Ci ncias Biom dicas Abel Salazar (ICBAS), Universidade do Porto, Portugal.

26 **\*Corresponding author:** Guy A. Rouleau

27 Address: Montreal Neurological Institute and Hospital,

28 3801 University Street, Room 636,

29 Montr al, Qu bec, Canada H3A 2B4

30 Email: [guy.rouleau@mcgill.ca](mailto:guy.rouleau@mcgill.ca)

31 Phone: +1 (514) 398-6644

32

33

34 **Abstract**

35 Machado-Joseph disease (MJD/SCA3) is the most common form of dominantly inherited ataxia  
36 worldwide. The disorder is caused by an expanded CAG repeat in the *ATXN3* gene. Past studies  
37 have revealed that the length of the expansion partly explains the disease age at onset (AO)  
38 variability of MJD, which is confirmed in this study. Using a total of 786 MJD patients from five  
39 different geographical origins, a genome-wide association study (GWAS) was conducted to  
40 identify additional AO modifying factors that could explain some of the residual AO variability.  
41 We identified nine suggestively associated loci ( $P < 1 \times 10^{-5}$ ). These loci were enriched for genes  
42 involved in vesicle transport, olfactory signaling, and synaptic pathways. Furthermore,  
43 associations between AO and the *TRIM29* and *RAG* genes suggests that DNA repair mechanisms  
44 might be implicated in MJD pathogenesis. Our study demonstrates the existence of several  
45 additional genetic factors, along with CAG expansion, that may lead to a better understanding of  
46 the genotype-phenotype correlation in MJD.

47 **Keywords**

48 Machado-Joseph disease, *ATXN3*, MJD/SCA3, age at onset, modifier, GWAS

## 49 **Introduction**

50 Machado-Joseph disease, also known as spinocerebellar ataxia type 3 (MJD/SCA3), is an  
51 autosomal dominant neurodegenerative disorder that is characterized by progressive cerebellar  
52 ataxia and pyramidal signs, which can be associated with a complex clinical picture and includes  
53 extrapyramidal signs or amyotrophy [1, 2]. MJD is caused by an abnormal CAG trinucleotide  
54 repeat expansion in exon 10 of the ataxin-3 gene (*ATXN3*), located at 14q32.1. Deleterious  
55 expansions consensually contain 61 to 87 CAG repeats, whereas wild type alleles range from 12  
56 to 44 [2].

57 As with other diseases caused by repeat expansions, such as Huntington's disease (HD) and other  
58 spinocerebellar ataxias, there is an inverse correlation between expanded repeat size and the age  
59 at which pathogenesis leads to disease onset [3]. Depending on the cohort structure, the size of the  
60 repeat expansion explains 55 to 70% of the age at onset (AO) variability in MJD, suggesting the  
61 existence of additional modifying factors [3,4]. Although several genetic factors have been  
62 proposed as modifiers, such as CAG repeat size of normal *ATXN3* (SCA3), *HTT* (HD), *ATXN2*  
63 (SCA2) and *ATNI* (DRPLA) alleles, *APOE* status, and expression level of *HSP40* [4,5,6], these  
64 were not replicated by subsequent studies [7, 8]. Since CAG tract profile and allelic frequencies  
65 of the potential modifier loci can have unique characteristics in different populations, large  
66 collaborative studies are required to identify genetic modifiers in MJD, as well as replicate the  
67 findings of such studies [8].

68 Previously, Genetic Modifiers of Huntington's Disease (GeM-HD) Consortium carried out a GWA  
69 approach of HD individuals to reveal genetic modifiers of AO in HD [9,10]. A total of eleven [9]  
70 and fourteen loci [10] were found to be associated with residual age at HD onset. In the present

71 study, we performed the first GWAS to identify some possible genetic modifiers of AO in MJD.  
72 First, we assessed the relationship between AO and size of the expanded ( $CAG_{exp}$ ) and normal  
73 ( $CAG_{nor}$ ) alleles, biological sex and geographical origin. Next, we determined a residual AO for  
74 each subject, which is the difference between the measured AO and the predicted/estimated AO  
75 from expanded CAG repeat size alone. Using the residuals as a quantitative phenotype for a  
76 GWAS, we looked for genetic factors that modulate AO in MJD.

## 77 **Methods**

### 78 **Study subjects**

79 A total of 786 MJD patients from five distinct geographical origins (Portugal, Brazil, North  
80 America, Germany and Australia) were included in the present study. The overall average age at  
81 onset (standard deviation) was 38 ( $\pm 1.82$ ) years, with a 1:1 male to female ratio. All subjects  
82 provided informed consent, and the study was approved by the respective institutional review  
83 boards. Detailed cohort demographics are shown in Supplementary Table 1.

### 84 **Assessment of the *ATXN3* CAG repeat length**

85 A singleplex polymerase chain reaction was performed to determine the length of the  $CAG_{exp}$  and  
86  $CAG_{nor}$  alleles at exon 10 of *ATXN3* [11]. The final volume for each assay was 10  $\mu$ L: 7.5 ng of  
87 gDNA, 0.2  $\mu$ M of each primer, 5  $\mu$ L of Taq PCR Master Mix Kit Qiagen®, 1  $\mu$ L of Q-Solution  
88 from Qiagen® and H<sub>2</sub>O. Fragment length analysis was done using ABIPrism 3730xl sequencer  
89 (Applied Biosystems®, McGill University and Genome Québec Innovation Centre) and  
90 GeneMapper software [12]. A stepwise regression model was performed to assess the correlation  
91 between AO and  $CAG_{exp}$  size, as well as gender, origin,  $CAG_{nor}$  size, and interaction between these

92 variables. Residual AO was calculated for each subject by subtracting individual's expected AO  
93 based upon  $CAG_{exp}$  size from actual AO, to be used as the primary phenotype for following genetic  
94 approach.

### 95 **Genotyping, quality control and imputation**

96 Samples were genotyped using the Global Screening Array v.1.0 from Illumina (636,139 markers).  
97 Sample-based (missingness, relatedness, sex, and multidimensional scaling analysis) and SNP-  
98 based quality assessments (missingness, Hardy-Weinberg equilibrium, and minor allele  
99 frequency) were conducted using PLINK version 1.9 [13]. In sample level QC, samples were  
100 excluded with one or more of the following: high missingness (missingness rate  $> 0.05$ ), close  
101 relationship ( $\pi$ -hat value  $> 0.2$ ), discrepancy between genetically-inferred sex and reported sex,  
102 population outliers (deviation  $\geq 4$  SD from the population mean in multidimensional scaling  
103 analysis). All SNPs were checked for marker genotyping call rate ( $> 98\%$ ), minor allele frequency  
104 (MAF)  $> 0.05$ , and HWE (p-value threshold =  $1.0 \times 10^{-5}$ ).

105 Phasing and imputation were performed using SHAPEIT [14] and PBWT [15] pipelines,  
106 implemented on the Sanger Imputation Service [16]. Haplotype Reference Consortium (HRC)  
107 reference panel r1.1 containing 64,940 human haplotypes at 40,405,505 genetic markers were used  
108 as the reference panel. Imputed variants with an allele count of 30 (MAF  $> 0.02$ ), an imputation  
109 quality score above 0.3 and an HWE p-value of  $> 1.0 \times 10^{-5}$  were included for subsequent analysis.

### 110 **Genome-wide association analysis**

111 A genome-wide linear mixed model based association analysis was conducted using GCTA  
112 version 1.91.7 [17]. Residual AO was modelled as a function of minor allele count of the test SNP,

113 sex, and the first three principal components based on the scree plot (Supplementary Figure 1).  
114 The --mlma-loco option, which takes into account the difference in allele frequency between  
115 populations, was used to control for population structure. QQ plots and Manhattan plots were  
116 generated in FUMA v.1.3.4 [18]. Regional association plots were generated using LocusZoom  
117 [19] (Supplementary Figure 3).

### 118 **Functional annotation of SNPs**

119 Genomic risk loci were defined using SNP2GENE function implemented in FUMA. Independent  
120 suggestive SNPs ( $P < 1 \times 10^{-5}$ ) with a threshold of  $r^2 < 0.6$  were selected within a 250 kb window.  
121 The UK Biobank release 2 European population consisting of randomly selected 10,000 subjects  
122 was used as the reference population panel. The ANNOVAR [20] categories and combined  
123 annotation-dependent depletion (CADD) [21] scores were obtained from FUMA for functional  
124 annotation. Functionally annotated variants were mapped to genes based on genomic position  
125 using FUMA positional mapping tool.

### 126 **Pathway analysis**

127 To identify known biological pathways and gene sets at the associated loci, an enrichment  
128 approach was applied using public datasets containing Gene Ontology (GO,  
129 <http://geneontology.org>), the Kyoto Encyclopaedia of Genes and Genomes (KEGG,  
130 <https://www.genome.jp/kegg>) and Reactome (<https://reactome.org>) pathways. The primary  
131 enrichment analysis was performed using the i-GSEA4GWAS v2 [22]. It uses a candidate list of  
132 a genome-wide set of genes mapped within the SNP loci and ranks them based on the strength of  
133 their association with the phenotype. Genes were mapped within 20 kb up or downstream of the  
134 SNPs with a  $P < 0.05$ . Gene and pathway sets meeting a false discovery rate (*FDR*)-corrected  $q$ -

135 value  $< 0.05$  were regarded as significantly associated with high confidence, and  $q$ -value  $< 0.25$   
136 was regarded to be possibly associated with the phenotype of interest. We performed a secondary  
137 gene-based association test using the Versatile Gene-based Association Study (VEGAS) [23]  
138 algorithm that controls the number of SNPs in each gene and the linkage disequilibrium (LD)  
139 between these SNPs using the HapMap European population. As a third algorithm to identify  
140 enriched pathways, we used Pathway Scoring Algorithm (PASCAL) [24], which controls for  
141 potential bias from gene size, SNP density, as well as LD. ClueGO [25] and CluePedia [26] plug-  
142 ins in Cytoscape were employed to visualize identified pathways and their clustering.

## 143 **Results**

### 144 **The inverse correlation between $CAG_{exp}$ and age at onset**

145 In the first phase of the study, the expanded *ATXN3*-CAG repeat lengths of 786 MJD patients were  
146 assessed. The mean (SD)  $CAG_{exp}$  size were Australia: 68.2 ( $\pm 3.3$ ), Brazil: 74.3 (3.9), Germany:  
147 72.9 ( $\pm 3.6$ ), North America: 73 ( $\pm 4.3$ ) and Portugal: 72 ( $\pm 4.0$ ). Next, the relationship between AO  
148 and  $CAG_{exp}$  size,  $CAG_{nor}$  size, sex and ethnicity was examined (Supplementary Table 1). The  
149 previously observed negative correlation between *ATXN3*  $CAG_{exp}$  size and AO [3] was confirmed  
150 (Pearson's correlation coefficient  $R^2 = 0.62$ ) (Figure 1). The  $CAG_{nor}$  size ( $P = 0.39$ ), sex ( $P = 0.02$ )  
151 and geographic origin ( $P$  [Brazil] = 0.38,  $P$  [Germany] = 0.38,  $P$  [North America] = 0.33,  $P$   
152 [Portugal] = 0.29) were not significant and their addition had little contribution to the model ( $\Delta R^2$   
153 = 0.0072). Residual AO for each sample was calculated and used as a quantitative phenotype to  
154 identify the modifiers of AO. The distribution of residual AO was close a theoretical normal  
155 distribution (Figure 1).

### 156 **Genome-wide association study**



157 After post-imputation quality assessments, a total of 700 individuals with genotyping information  
158 for 6,716,580 variants remained for GWAS. The resulting Manhattan plots and quantile-quantile  
159 (QQ) plots are shown in Figure 2. The genomic inflation factor was close to one ( $\lambda = 0.98$ ),  
160 indicating the p-values were not inflated. No association signal was identified meeting genome-  
161 wide significance ( $P < 5 \times 10^{-8}$ , the genome-wide Bonferroni-corrected significance threshold);  
162 however, genome-wide suggestive associations ( $P < 1 \times 10^{-5}$ ) with 204 variants across 9 loci were  
163 identified (Supplementary Table 3). The most significantly associated SNP at each locus are shown  
164 in Table 1. Positional gene mapping aligned SNPs to 17 genes by their genomic location. Fourteen  
165 of the 204 variants had a Combined Annotation Dependent Depletion (CADD)-PHRED score  
166 higher than the suggested threshold for deleterious SNPs (12.37), arguing the given loci have a  
167 functional role [27].

### 168 **Interaction analysis between $CAG_{exp}$ and SNP genotype**

169 To assess a possible interaction between  $CAG_{exp}$  size and the variants identified, each of the nine  
170 variants was added to the initial linear regression, modelling AO as a function of  $CAG_{exp}$  size,  
171 SNP, sex, the first three principal components,  $CAG_{nor}$  size, and interaction of SNP: $CAG_{exp}$ .  
172 Association of each independent SNP with AO revealed nominally significant p-values. Among  
173 the nine variants, only rs585809 (mapped to *TRIM29*) had a significant interaction with  $CAG_{exp}$  ( $P$   
174 = 0.01), suggesting that rs585809 might modulate AO through this epistatic interaction on  $CAG_{exp}$ .

### 175 **Association of HD-AO modifier variants in MJD**

176 Association of previously identified HD-AO modifier loci in MJD were assessed. Among the 25  
177 HD-AO modifier variants in 17 loci, a total of 18 variants ( $MAF > 0.02$ ) in 12 loci were tested in  
178 this study (Supplementary Table 4). None of these HD-AO modifiers reached the genome-wide

179 suggestive threshold. However, two variants rs144287831 ( $P = 0.02$ , effect size = - 0.98) and  
180 rs1799977 ( $P = 0.02$ , effect size = - 0.98) in the *MLH1* locus were found to be nominally associated  
181 with a later AO in MJD.

## 182 **Pathway and gene-set enrichment analysis**

183 A gene-set enrichment and pathway analysis was conducted using i-GSEA4GWAS. Various  
184 approaches and algorithms are currently in use to conduct similar analyses. To be able to make  
185 better comparisons with other studies that may use different approaches, we performed a secondary  
186 gene-set enrichment and pathway analysis using the VEGAS2 and PASCAL software  
187 (Supplementary Tables 5-7). We also used these results for replication purposes in our own study.  
188 A total of 13 overrepresented pathways were found, after FDR-multiple testing correction (q-value  
189  $< 0.05$ ) in the primary GSEA analysis and replicated using at least one of the secondary gene-set  
190 enrichment algorithms (Table 2). Overall, the most significantly enriched gene-sets and pathways  
191 were vesicle transport, olfactory signaling, and synaptic pathways. Visualization and clustering of  
192 pathways are shown in Figure 3.

193

## 194 **Discussion**

195 Using five cohorts from different geographical origins, we performed the first GWAS to examine  
196 the presence of genetic factors that could modify AO in MJD. We identified a total of nine loci  
197 that were potentially associated with either an earlier or later AO. Concomitantly, we confirmed  
198 the previously observed negative correlation between  $CAG_{exp}$  and AO [3]. It was shown previously  
199 that normal *ATXN3* allele ( $CAG_{nor}$ ) had a significant influence on AO of MJD [28]; however,

200 several studies did not replicate this effect [6,8]. Indeed, we did not observe an association between  
201 CAG<sub>nor</sub> and AO. However, it had little contribution to our model, with a minor difference in the  
202 correlation coefficient ( $\Delta R^2 = 0.0012$ ).

203 In our GWAS, the strongest signal is for the rs11529293 variant ( $P = 3.30 \times 10^{-6}$ ) within the  
204 *C11orf72* and *RAG* loci at 11p12. Within this locus, two *RAG* genes, recombination-activating  
205 genes *RAG1* and *RAG2*, were shown to be implicated in DNA damage response and DNA repair  
206 machineries [29,30]. The rs585809 variant, which was mapped to the *TRIM29* gene, was found to  
207 interact with CAG<sub>exp</sub>, suggesting that it might have an effect on AO through this interaction. Both  
208 *RAG* and *TRIM29* loci were identified as AO-hastening modifiers. *TRIM29* encodes for tripartite  
209 motif protein 29, which is implicated in mismatch repair and double strand breaks pathways  
210 [31,32]. *TRIM29* is involved both upstream and downstream of these pathways, in the regulation  
211 of DNA repair proteins into chromatin by mediating the interaction between them. One of these  
212 DNA repair proteins is *MLH1*, which is implicated in mismatch repair complex [32]. Previously,  
213 the *MLH1* locus was identified as an AO modifier in another neurodegenerative disease caused by  
214 CAG repeat expansion, Huntington's disease [9,10,33]. Additionally, in a genome-wide genetic  
215 screening study, *MLH1*-knock out was shown to modify the somatic expansion of the CAG repeat  
216 and slow the pathogenic process in HD mouse model [34]. Overall, the association of *TRIM29* and  
217 *RAG* loci suggests that DNA repair mechanisms may be implicated in the alteration of AO of MJD,  
218 as well as HD, and may have a role in the pathogenesis of other CAG repeat diseases. Interestingly,  
219 in a previous study, we found variants in three transcription-coupled repair genes (*ERCC6*, *RPA*,  
220 and *CDK7*) associated with different CAG instability patterns in MJD [35].

221 We identified gene-sets enriched in olfactory signaling, vesicle transport, and synaptic pathways.  
222 Olfactory dysfunction is one of the main non-motor symptoms that was already described in

223 patients with MJD [36,37]. In a previous study, transplantation of olfactory ensheathing cells,  
224 which are specialized glial cells of the primary olfactory system, were found to improve motor  
225 function in an MJD mice model, and were suggested as a novel potential strategy for MJD  
226 treatment [38]. Vesicle transport and synaptic pathways were also implicated in MJD, as well as  
227 in other neurodegenerative diseases [39,40]. An interruption of synaptic transmission caused by  
228 an expanded polyglutamine repeat and mutant ataxin-3 aggregates were shown in *Drosophila* and  
229 *Caenorhabditis elegans* models of MJD. Therefore, the interaction between synaptic vesicles and  
230 mutant aggregates supports the role of synaptic vesicle transport in the pathogenesis of MJD  
231 [41,42]. Overall, we suggest that these gene-sets and pathways might construct a larger molecular  
232 network that could modulate the AO in MJD.

233 In summary, our study identified nine genetic loci that may modify the AO of MJD. Identification  
234 of *TRIM29* and *RAG* genetic variants, as well as our gene-set enrichment analyses, implicated  
235 DNA repair, olfactory signaling, synaptic, and vesicle transport pathways in the pathogenesis of  
236 MJD. Although we used different cohorts from five distinct geographical ethnicities, a replication  
237 study in similar or additional populations would add valuable evidence to support our findings.

238

239 **Description of Supplemental Data**

240 Supplemental Data include three figures and seven tables

241 **Declaration of Interests**

242 The authors declare no conflict of interest.

243 **Acknowledgements**

244 The authors thank the participants for their contribution to the study. The authors would like to  
245 thank Jay P. Ross, Faezeh Sarayloo, Zoe Schmilovich and S. Can Akerman for their assistance in  
246 reviewing the manuscript and scientific content. FA was funded by the Fonds de Recherche du  
247 Québec–Santé. SM is funded by FCT (CEECIND/00684/2017) and by NORTE-01-0145-FEDER-  
248 000008, supported by Norte Portugal Regional Programme (NORTE 2020), under the  
249 PORTUGAL 2020 Partnership Agreement, through the European Regional Development Fund  
250 (ERDF). FM and LI are funded by Fundação de Amparo a Pesquisa do Estado de São Paulo  
251 (FAPESP, 2013/07559-3). MLSP and LBJ were funded by Conselho Nacional de  
252 Desenvolvimento Científico e Tecnológico, Brazil (CNPq) and by Coordenação de  
253 Aperfeiçoamento de Pessoal de Nível Superior (CAPES). GAR holds a Canada Research Chair in  
254 Genetics of the Nervous System and the Wilder Penfield Chair in Neurosciences.

255

256

257 **Table 1.** Suggestive loci associated with residual age at onset in MJD. Chr: chromosome, MAF: minor allele frequency, 1KGP: 1000  
 258 Genomes Project

| SNP         | Chr | Position<br>(GRCh37) | Nearest gene                                 | Minor<br>allele | Major<br>allele | MJD<br>MAF | 1KGP<br>MAF | b<br>(SNP effect) | P-value               |
|-------------|-----|----------------------|----------------------------------------------|-----------------|-----------------|------------|-------------|-------------------|-----------------------|
| rs62171220  | 2   | 137802855            | <i>THSD7B</i>                                | G               | C               | 0.13       | 0.11        | 2.71              | $4.45 \times 10^{-6}$ |
| rs2067390   | 2   | 191209028            | <i>HIBCH, INPP1</i>                          | A               | T               | 0.04       | 0.06        | 4.74              | $6.39 \times 10^{-6}$ |
| rs144891322 | 5   | 85135387             | <i>RPL5P17,</i>                              | C               | T               | 0.02       | 0.007       | 6.10              | $5.18 \times 10^{-6}$ |
| rs11529293  | 11  | 36855388             | <i>C11orf74, RAG1,</i><br><i>RAG2</i>        | T               | C               | 0.14       | 0.26        | -2.71             | $3.30 \times 10^{-6}$ |
| rs7480166   | 11  | 42984753             | <i>HNRNPKP3</i>                              | A               | G               | 0.40       | 0.40        | -1.86             | $4.17 \times 10^{-6}$ |
| rs585809    | 11  | 119949979            | <i>TRIM29</i>                                | T               | C               | 0.06       | 0.17        | -3.76             | $9.50 \times 10^{-6}$ |
| rs72660056  | 13  | 113507543            | <i>ATP11A</i>                                | A               | G               | 0.08       | 0.05        | -3.29             | $3.94 \times 10^{-6}$ |
| rs11857349  | 15  | 99924857             | <i>TTC23, SYNM,</i><br><i>LRRC28</i>         | G               | A               | 0.04       | 0.02        | -4.58             | $3.43 \times 10^{-6}$ |
| rs8141510   | 22  | 42821185             | <i>NFAMI, CYP2D6,</i><br><i>NAGA, NDUFA6</i> | C               | T               | 0.43       | 0.49        | 1.83              | $3.94 \times 10^{-6}$ |

259

260

261 **Table 2.** Pathways significant after multiple-correction ( $q < 5 \times 10^{-2}$ ) in the primary GSEA analysis and replicated using at least one of  
 262 the secondary gene-set enrichment algorithms. NA means that the pathway was not enriched by at least two significant genes in VEGAS.

| Pathway      | Description                           | p-value<br>(GSEA)      | q-value<br>(GSEA)     | p-value<br>(VEGAS)      | permuted<br>p-value<br>(VEGAS) | p-value<br>(PASCAL)    |
|--------------|---------------------------------------|------------------------|-----------------------|-------------------------|--------------------------------|------------------------|
| GO:0030133   | transport vesicle                     | $< 1.0 \times 10^{-3}$ | $8.20 \times 10^{-3}$ | $6.15 \times 10^{-40}$  | $4.46 \times 10^{-1}$          | $6.70 \times 10^{-3}$  |
| KEGG:04740   | olfactory transduction                | $< 1.0 \times 10^{-3}$ | $8.30 \times 10^{-3}$ | NA                      | NA                             | $3.89 \times 10^{-4}$  |
| R-HSA:381753 | olfactory signaling pathway           | $< 1.0 \times 10^{-3}$ | $8.80 \times 10^{-3}$ | $1.10 \times 10^{-27}$  | $7.71 \times 10^{-1}$          | $2.51 \times 10^{-4}$  |
| GO:0044456   | synapse part                          | $< 1.0 \times 10^{-3}$ | $9.30 \times 10^{-3}$ | $1.25 \times 10^{-182}$ | $< 1.0 \times 10^{-6}$         | $< 1.0 \times 10^{-7}$ |
| R-HSA:74217  | purine salvage                        | $< 1.0 \times 10^{-3}$ | $1.06 \times 10^{-2}$ | $1.06 \times 10^{-2}$   | $2.15 \times 10^{-1}$          | $6.48 \times 10^{-3}$  |
| GO:0045202   | synapse                               | $< 1.0 \times 10^{-3}$ | $1.15 \times 10^{-2}$ | $1.15 \times 10^{-2}$   | $< 1.0 \times 10^{-6}$         | $< 1.0 \times 10^{-7}$ |
| GO:0004177   | aminopeptidase activity               | $< 1.0 \times 10^{-3}$ | $1.50 \times 10^{-2}$ | $1.50 \times 10^{-2}$   | $3.41 \times 10^{-1}$          | $1.24 \times 10^{-2}$  |
| GO:0008238   | exopeptidase activity                 | $< 1.0 \times 10^{-3}$ | $1.80 \times 10^{-2}$ | $1.80 \times 10^{-2}$   | $2.80 \times 10^{-2}$          | $8.31 \times 10^{-3}$  |
| GO:0006898   | receptor mediated endocytosis         | $< 1.0 \times 10^{-3}$ | $2.25 \times 10^{-2}$ | $2.25 \times 10^{-2}$   | $2.03 \times 10^{-1}$          | $6.64 \times 10^{-3}$  |
| GO:0016917   | GABA receptor activity                | $< 1.0 \times 10^{-3}$ | $2.26 \times 10^{-2}$ | $2.26 \times 10^{-2}$   | $1.30 \times 10^{-4}$          | $2.30 \times 10^{-5}$  |
| GO:0030140   | trans Golgi network transport vesicle | $< 1.0 \times 10^{-3}$ | $2.36 \times 10^{-2}$ | $2.36 \times 10^{-2}$   | $2.80 \times 10^{-2}$          | $1.28 \times 10^{-1}$  |
| GO:0009725   | response to hormone stimulus          | $< 1.0 \times 10^{-3}$ | $2.73 \times 10^{-2}$ | $2.73 \times 10^{-2}$   | $1.32 \times 10^{-1}$          | $1.30 \times 10^{-4}$  |
| GO:0030425   | Dendrite                              | $< 1.0 \times 10^{-3}$ | $3.86 \times 10^{-2}$ | $3.86 \times 10^{-2}$   | $< 1.0 \times 10^{-6}$         | $< 1.0 \times 10^{-7}$ |

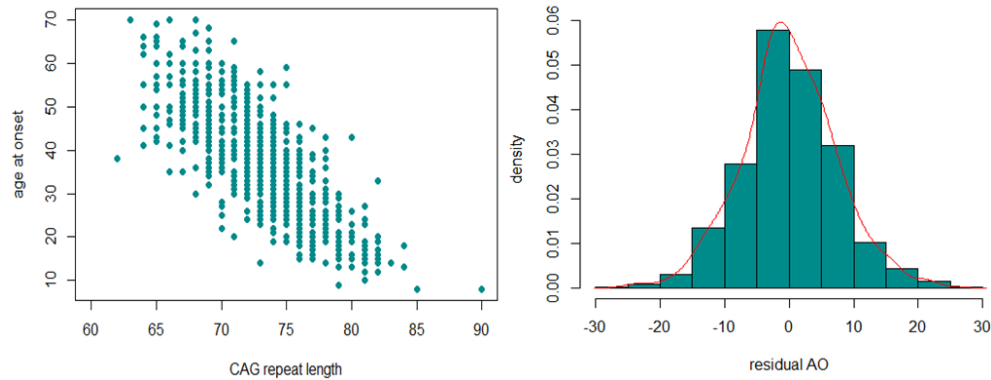

264

265 **Figure 1.** The inverse correlation between  $CAG_{exp}$  and AO (left) and the distribution of residual AO (right) observed in our MJD cohort.

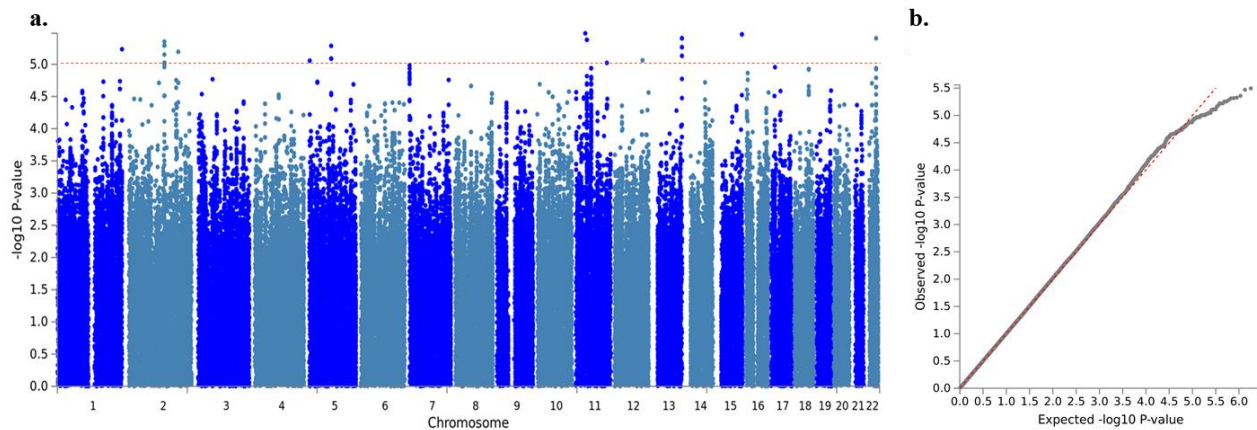

266

267 **Figure 2.** Manhattan plot (a) and QQ plot (b) of the GWAS for residual AO of MJD. Imputed using the HRC panel, 6,716,580 variants  
 268 that passed QC are included in the plot. The x-axis shows the physical position along the genome. The y-axis shows the  $-\log_{10}(p\text{-value})$   
 269 for association. The red line indicates the level of genome-wide suggestive association ( $P = 1 \times 10^{-5}$ ).



a.

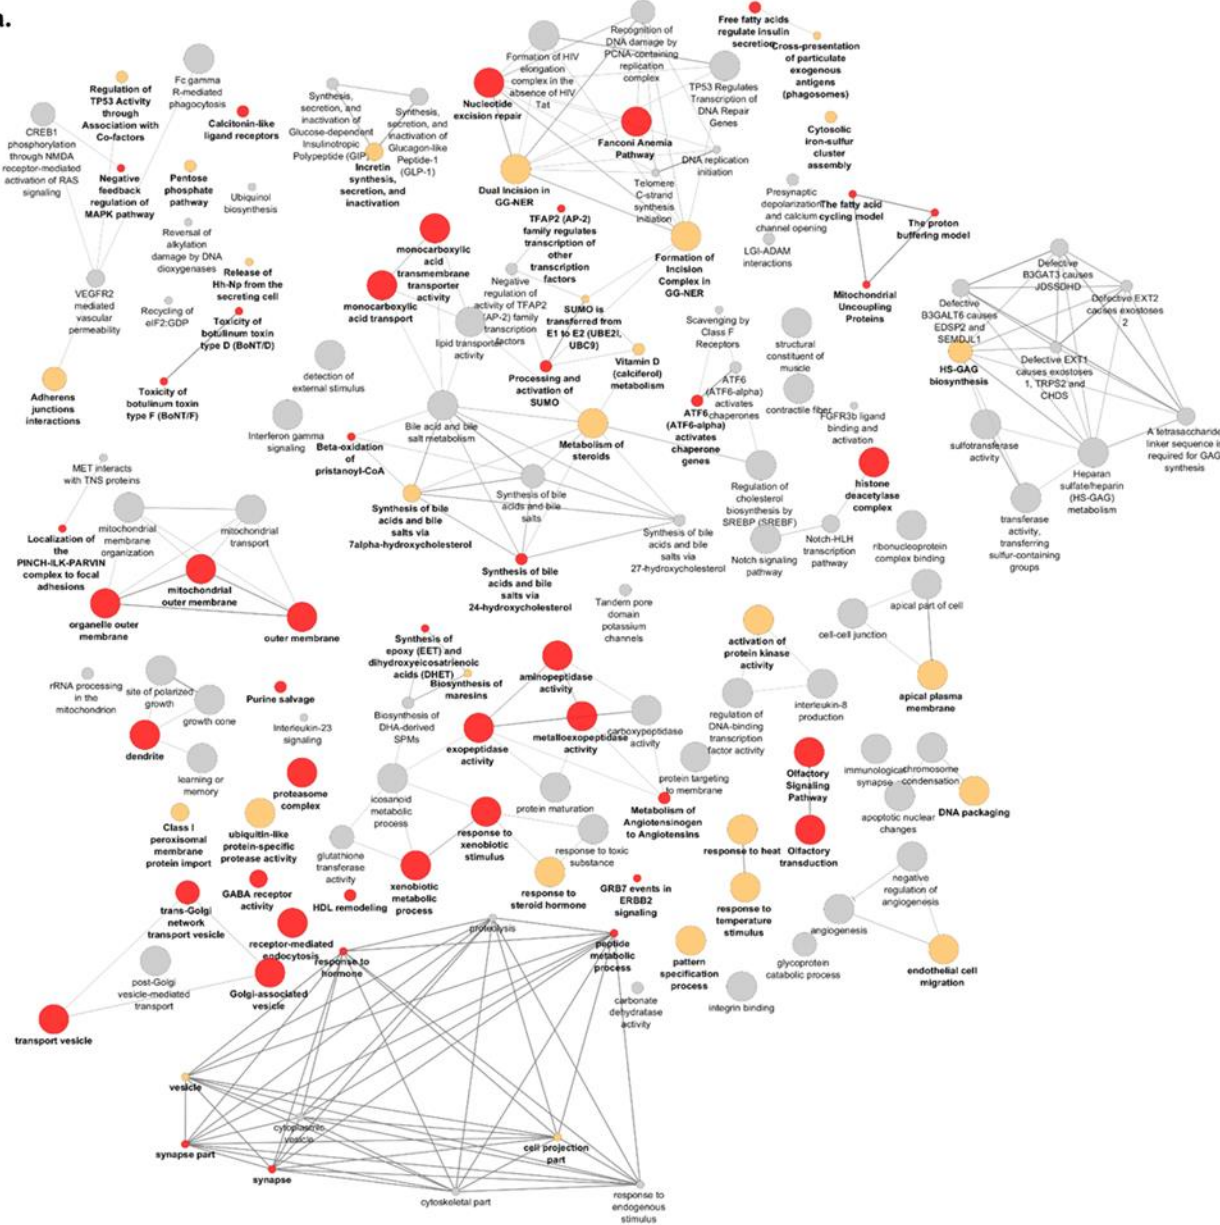

b.

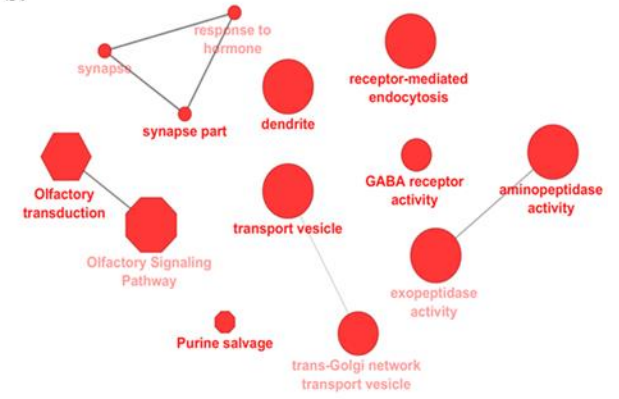

271 **Figure 3.** Visualization of the gene-sets and pathways enriched in primary GSEA analysis (a) and replicated in VEGAS and PASCAL  
272 (b). The size of the nodes corresponds to the number of the genes associated with a term. The significance is represented by the color of  
273 the nodes ( $P < 0.05$ ,  $0.05 < P < 0.1$  and  $P > 0.1$  are represented by red, yellow and gray, respectively).

## 274 References

- 275 1. Twist, E.C. *et al.* Machado Joseph disease maps to the same region of chromosome 14 as the  
276 spinocerebellar ataxia type 3 locus. *Journal of Medical Genetics* **32**, 25-31 (1995).
- 277 2. Bettencourt, C. & Lima, M. Machado-Joseph Disease: from first descriptions to new  
278 perspectives. *Orphanet J Rare Dis* **6**, 35 (2011).
- 279 3. Maciel, P. *et al.* Correlation between CAG repeat length and clinical features in Machado-Joseph  
280 disease. *Am J Hum Genet* **57**, 54-61 (1995).
- 281 4. de Mattos, E.P., Kolbe Musskopf, M., Bielefeldt Leotti, V., Saraiva-Pereira, M.L. & Jardim, L.B.  
282 Genetic risk factors for modulation of age at onset in Machado-Joseph disease/spinocerebellar  
283 ataxia type 3: a systematic review and meta-analysis. *Journal of Neurology, Neurosurgery &*  
284 *Psychiatry* **90**, 203-210 (2019).
- 285 5. Zijlstra, M.P. *et al.* Levels of DNAJB family members (HSP40) correlate with disease onset in  
286 patients with spinocerebellar ataxia type 3. *European Journal of Neuroscience* **32**, 760-770  
287 (2010).
- 288 6. Tezenas du Montcel, S. *et al.* Modulation of the age at onset in spinocerebellar ataxia by CAG  
289 tracts in various genes. *Brain* **137**, 2444-2455 (2014).
- 290 7. Chen, Z. *et al.* (CAG)*n* loci as genetic modifiers of age-at-onset in patients with Machado-Joseph  
291 disease from mainland China. *Brain* **139**, e41-e41 (2016).
- 292 8. Raposo, M., Ramos, A., Bettencourt, C. & Lima, M. Replicating studies of genetic modifiers in  
293 spinocerebellar ataxia type 3: can homogeneous cohorts aid? *Brain* **138**, e398-e398 (2015).
- 294 9. Genetic Modifiers of Huntington's Disease, C. Identification of Genetic Factors that Modify  
295 Clinical Onset of Huntington's Disease. *Cell* **162**, 516-26 (2015).
- 296 10. Lee, J.-M. *et al.* CAG Repeat Not Polyglutamine Length Determines Timing of Huntington's  
297 Disease Onset. *Cell* **178**, 887-900.e14 (2019).
- 298 11. Martins, S., Calafell, F., Wong, V.C., Sequeiros, J. & Amorim, A. A multistep mutation mechanism  
299 drives the evolution of the CAG repeat at MJD/SCA3 locus. *Eur J Hum Genet* **14**, 932-40 (2006).
- 300 12. Chatterji, S. & Pachter, L. Reference based annotation with GeneMapper. *Genome biology* **7**,  
301 R29-R29 (2006).
- 302 13. Chang, C.C. *et al.* Second-generation PLINK: rising to the challenge of larger and richer datasets.  
303 *Gigascience* **4**, 7 (2015).
- 304 14. Delaneau, O., Marchini, J. & Zagury, J.-F. A linear complexity phasing method for thousands of  
305 genomes. *Nature Methods* **9**, 179 (2011).
- 306 15. Durbin, R. Efficient haplotype matching and storage using the positional Burrows-Wheeler  
307 transform (PBWT). *Bioinformatics (Oxford, England)* **30**, 1266-1272 (2014).
- 308 16. McCarthy, S. *et al.* A reference panel of 64,976 haplotypes for genotype imputation. *Nature*  
309 *genetics* **48**, 1279-1283 (2016).
- 310 17. Yang, J., Lee, S.H., Goddard, M.E. & Visscher, P.M. GCTA: a tool for genome-wide complex trait  
311 analysis. *American journal of human genetics* **88**, 76-82 (2011).
- 312 18. Watanabe, K., Taskesen, E., van Bochoven, A. & Posthuma, D. Functional mapping and  
313 annotation of genetic associations with FUMA. *Nature Communications* **8**, 1826 (2017).
- 314 19. Pruim, R.J. *et al.* LocusZoom: regional visualization of genome-wide association scan results.  
315 *Bioinformatics (Oxford, England)* **26**, 2336-2337 (2010).
- 316 20. Wang, K., Li, M. & Hakonarson, H. ANNOVAR: functional annotation of genetic variants from  
317 high-throughput sequencing data. *Nucleic Acids Res* **38**, e164 (2010).
- 318 21. Rentzsch, P., Witten, D., Cooper, G.M., Shendure, J. & Kircher, M. CADD: predicting the  
319 deleteriousness of variants throughout the human genome. *Nucleic Acids Research* **47**, D886-  
320 D894 (2018).

- 321 22. Zhang, K., Cui, S., Chang, S., Zhang, L. & Wang, J. i-GSEA4GWAS: a web server for identification  
322 of pathways/gene sets associated with traits by applying an improved gene set enrichment  
323 analysis to genome-wide association study. *Nucleic Acids Research* **38**, W90-W95 (2010).
- 324 23. Mishra, A. & Macgregor, S. VEGAS2: Software for More Flexible Gene-Based Testing. *Twin*  
325 *Research and Human Genetics* **18**, 86-91 (2014).
- 326 24. Lamparter, D., Marbach, D., Rueedi, R., Kutalik, Z. & Bergmann, S. Fast and Rigorous  
327 Computation of Gene and Pathway Scores from SNP-Based Summary Statistics. *PLoS Comput*  
328 *Biol* **12**, e1004714 (2016).
- 329 25. Bindea, G. *et al.* ClueGO: a Cytoscape plug-in to decipher functionally grouped gene ontology  
330 and pathway annotation networks. *Bioinformatics (Oxford, England)* **25**, 1091-1093 (2009).
- 331 26. Bindea, G., Galon, J. & Mlecnik, B. CluePedia Cytoscape plugin: pathway insights using integrated  
332 experimental and in silico data. *Bioinformatics (Oxford, England)* **29**, 661-663 (2013).
- 333 27. Amendola, L.M. *et al.* Actionable exomic incidental findings in 6503 participants: challenges of  
334 variant classification. *Genome research* **25**, 305-315 (2015).
- 335 28. Franca, M.C., Jr. *et al.* Normal ATXN3 Allele but Not CHIP Polymorphisms Modulates Age at  
336 Onset in Machado-Joseph Disease. *Front Neurol* **3**, 164 (2012).
- 337 29. Lescale, C. & Deriano, L. The RAG recombinase: Beyond breaking. *Mechanisms of Ageing and*  
338 *Development* **165**, 3-9 (2017).
- 339 30. Bahjat, M. & Guikema, J.E.J. The Complex Interplay between DNA Injury and Repair in  
340 Enzymatically Induced Mutagenesis and DNA Damage in B Lymphocytes. *Int J Mol Sci* **18**(2017).
- 341 31. Wikiniyadhane, R., Leksuthirat, T., Stitchantrakul, W., Chitphuk, S. & Dejsuphong, D. AB064.  
342 TRIM29: a novel gene involved in DNA repair mechanisms. *Annals of Translational Medicine* **5**,  
343 AB064-AB064 (2017).
- 344 32. Masuda, Y. *et al.* TRIM29 regulates the assembly of DNA repair proteins into damaged  
345 chromatin. *Nat Commun* **6**, 7299 (2015).
- 346 33. Lee, J.-M. *et al.* A modifier of Huntington's disease onset at the MLH1 locus. *Human Molecular*  
347 *Genetics* **26**, 3859-3867 (2017).
- 348 34. Pinto, R.M. *et al.* Mismatch repair genes Mlh1 and Mlh3 modify CAG instability in Huntington's  
349 disease mice: genome-wide and candidate approaches. *PLoS Genet* **9**, e1003930 (2013).
- 350 35. Martins, S. *et al.* Modifiers of (CAG)(n) instability in Machado-Joseph disease (MJD/SCA3)  
351 transmissions: an association study with DNA replication, repair and recombination genes. *Hum*  
352 *Genet* **133**, 1311-8 (2014).
- 353 36. Braga-Neto, P. *et al.* Clinical correlates of olfactory dysfunction in spinocerebellar ataxia type 3.  
354 *Parkinsonism Relat Disord* **17**, 353-6 (2011).
- 355 37. Pedrosa, J.L. *et al.* Nonmotor and extracerebellar features in Machado-Joseph disease: a review.  
356 *Mov Disord* **28**, 1200-8 (2013).
- 357 38. Hsieh, J. *et al.* Human Olfactory Ensheathing Cell Transplantation Improves Motor Function in a  
358 Mouse Model of Type 3 Spinocerebellar Ataxia. *Cell Transplant* **26**, 1611-1621 (2017).
- 359 39. Wiatr, K. *et al.* Altered Levels of Proteins and Phosphoproteins, in the Absence of Early Causative  
360 Transcriptional Changes, Shape the Molecular Pathogenesis in the Brain of Young  
361 Presymptomatic Ki91 SCA3/MJD Mouse. *Mol Neurobiol* (2019).
- 362 40. Gissen, P. & Maher, E.R. Cargos and genes: insights into vesicular transport from inherited  
363 human disease. *J Med Genet* **44**, 545-55 (2007).
- 364 41. Gunawardena, S. & Goldstein, L.S.B. Polyglutamine Diseases and Transport Problems: Deadly  
365 Traffic Jams on Neuronal Highways. *JAMA Neurology* **62**, 46-51 (2005).
- 366 42. Khan, L.A. *et al.* Expanded polyglutamines impair synaptic transmission and ubiquitin-  
367 proteasome system in *Caenorhabditis elegans*. *J Neurochem* **98**, 576-87 (2006).
